# Supplementary material
Source: PubMed Central journal article supplement (PMC3603339)

Table S1. Logistic regression models used to fit cold mortality curves for each genotype at each temperature. Shown are the analysis of deviance results and  $LT_{50}$  estimates with standard error calculated using binomial (Figs. 1,2) and quasibinomial variance functions.

| Genotype   | Factors   | Temperature (°C) | Df. | Deviance | Residual Df. | Residual Deviance | $LT_{50} \pm SE$ (binomial) | $P(> \chi )^1$ | $F$    | $Pr(>F)^2$    | SE (quasibinomial) |
|------------|-----------|------------------|-----|----------|--------------|-------------------|-----------------------------|----------------|--------|---------------|--------------------|
| Berlin-K   | Null Time | -4               | 1   | 228.29   | 29           | 244.736           | 74.13±1.17 (min)            | <2.2e-16 ***   | 444.68 | <2.2e-16 ***  | ±0.84 (min)        |
| Canton-S   |           |                  |     |          | 28           | 16.446            | 98.22±1.55 (min)            |                |        |               |                    |
| Hikone-A-S | Null Time | -4               | 1   | 314.33   | 34           | 374.86            | 98.22±1.55 (min)            | <2.2e-16 ***   | 177.82 | 7.672e-15 *** | ±2.06 (min)        |
| Oregon-R-C |           |                  |     |          | 33           | 60.52             | 109.64±1.56 (min)           |                |        |               |                    |
| Berlin-K   | Null Time | -4               | 1   | 269.67   | 31           | 301.525           | 109.64±1.56 (min)           | <2.2e-16 ***   | 282.08 | <2.2e-16 ***  | ±1.52 (min)        |
| Canton-S   |           |                  |     |          | 30           | 31.852            | 104.63±2.51 (min)           |                |        |               |                    |
| Hikone-A-S | Null Time | -4               | 1   | 175.82   | 41           | 370.46            | 104.63±2.51 (min)           | <2.2e-16 ***   | 36.194 | 4.486e-07 *** | ±5.55 (min)        |
| Oregon-R-C |           |                  |     |          | 40           | 194.64            | 129.04±2.28 (min)           |                |        |               |                    |
| Berlin-K   | Null Time | -4               | 1   | 244.67   | 34           | 358.47            | 129.04±2.28 (min)           | <2.2e-16 ***   | 54.069 | 1.92e-08 ***  | ±4.86 (min)        |
| Canton-S   |           |                  |     |          | 33           | 113.80            | 11.15±0.26 (h)              |                |        |               |                    |
| Hikone-A-S | Null Time | -2               | 1   | 233.62   | 37           | 272.040           | 11.15±0.26 (h)              | <2.2e-16 ***   | 221.30 | <2.2e-16 ***  | ±0.27 (h)          |
| Oregon-R-C |           |                  |     |          | 36           | 38.418            | 4.76±0.12 (h)               |                |        |               |                    |
| Berlin-K   | Null Time | -2               | 1   | 356.75   | 36           | 397.76            | 4.76±0.12 (h)               | <2.2e-16 ***   | 48.682 | 4.088e-08 *** | ±0.27 (h)          |
| Canton-S   |           |                  |     |          | 35           | 41.00             | 12.20±0.39 (h)              |                |        |               |                    |
| Hikone-A-S | Null Time | -2               | 1   | 149.15   | 37           | 266.89            | 12.20±0.39 (h)              | <2.2e-16 ***   | 54.084 | 1.132e-08 *** | ±0.65 (h)          |
| Oregon-R-C |           |                  |     |          | 36           | 117.74            | 10.59±0.22 (h)              |                |        |               |                    |
| Berlin-K   | Null Time | -2               | 1   | 249.9    | 37           | 344.65            | 10.59±0.22 (h)              | <2.2e-16 ***   | 104.89 | 3.271e-12 *** | ±0.35 (h)          |
| Canton-S   |           |                  |     |          | 36           | 94.76             | 12.17±0.22 (h)              |                |        |               |                    |
| Hikone-A-S | Null Time | -2               | 1   | 303.5    | 37           | 378.9             | 12.17±0.22 (h)              | <2.2e-16 ***   | 131.72 | 1.384e-13 *** | ±0.33 (h)          |
| Oregon-R-C |           |                  |     |          | 36           | 75.4              | 14.86±0.62 (h)              |                |        |               |                    |
| Berlin-K   | Null Time | 0                | 1   | 136.53   | 30           | 207.691           | 14.86±0.62 (h)              | <2.2e-16 ***   | 46.855 | 1.615e-07 *** | ±0.57 (h)          |
| Canton-S   |           |                  |     |          | 29           | 71.162            | 11.38±0.32 (h)              |                |        |               |                    |
| Hikone-A-S | Null Time | 0                | 1   | 220.39   | 35           | 279.910           | 11.38±0.32 (h)              | <2.2e-16 ***   | 77.892 | 2.583e-10 *** | ±0.55 (h)          |
| Oregon-R-C |           |                  |     |          | 34           | 59.522            | 26.52±0.88 (h)              |                |        |               |                    |
| Berlin-K   | Null Time | 0                | 1   | 129.49   | 26           | 206.284           | 26.52±0.88 (h)              | <2.2e-16 ***   | 22.644 | 6.966e-05 *** | ±2.09 (h)          |
| Canton-S   |           |                  |     |          | 25           | 76.794            | 18.06±0.60 (h)              |                |        |               |                    |
| Hikone-A-S | Null Time | 0                | 1   | 78.539   | 32           | 154.712           | 18.06±0.60 (h)              | <2.2e-16 ***   | 21.748 | 5.623e-05 *** | ±1.13 (h)          |
| Oregon-R-C |           |                  |     |          | 31           | 76.173            |                             |                |        |               |                    |

|            |   |        |    |         |                |              |        |               |           |  |
|------------|---|--------|----|---------|----------------|--------------|--------|---------------|-----------|--|
| RAL-208    | 0 |        |    |         |                |              |        |               |           |  |
| Null Time  | 1 | 228.50 | 33 | 343.50  | 16.59±0.29 (h) | <2.2e-16 *** | 63.125 | 4.554e-09 *** | ±0.56 (h) |  |
| Berlin-K   | 2 |        |    |         |                |              |        |               |           |  |
| Null Time  | 1 | 208.65 | 32 | 277.372 | 16.04±0.44 (h) | <2.2e-16 *** | 108.19 | 1.241e-11 *** | ±0.62 (h) |  |
| Canton-S   | 2 |        |    |         |                |              |        |               |           |  |
| Null Time  | 1 | 92.496 | 34 | 157.095 | 30.01±0.72 (h) | <2.2e-16 *** | 50.261 | 4.068e-08 *** | ±0.98 (h) |  |
| Hikone-A-S | 2 |        |    |         |                |              |        |               |           |  |
| Null Time  | 1 | 77.289 | 27 | 115.797 | 36.14±0.80 (h) | <2.2e-16 *** | 54.647 | 7.529e-08 *** | ±0.95 (h) |  |
| Oregon-R-C | 2 |        |    |         |                |              |        |               |           |  |
| Null Time  | 1 | 170.85 | 34 | 217.546 | 19.75±0.67 (h) | <2.2e-16 *** | 124.28 | 9.942e-13 *** | ±0.79 (h) |  |
| RAL-208    | 2 |        |    |         |                |              |        |               |           |  |
| Null Time  | 1 | 113    | 36 | 196.483 | 33.66±0.80 (h) | <2.2e-16 *** | 42.688 | 1.541e-07 *** | ±1.31 (h) |  |
| Berlin-K   | 4 |        |    |         |                |              |        |               |           |  |
| Null Time  | 1 | 104.93 | 23 | 140.491 | 28.63±2.52 (h) | <2.2e-16 *** | 66.612 | 4.229e-08 *** | ±3.16 (h) |  |
| Canton-S   | 4 |        |    |         |                |              |        |               |           |  |
| Null Time  | 1 | 147.81 | 23 | 208.055 | 40.00±2.14 (h) | <2.2e-16 *** | 50.2   | 4.167e-07 *** | ±3.67 (h) |  |
| Hikone-A-S | 4 |        |    |         |                |              |        |               |           |  |
| Null Time  | 1 | 143.74 | 23 | 201.738 | 46.96±2.24 (h) | <2.2e-16 *** | 37.817 | 3.443e-06 *** | ±4.37 (h) |  |
| Oregon-R-C | 4 |        |    |         |                |              |        |               |           |  |
| Null Time  | 1 | 107.35 | 23 | 132.166 | 18.29±1.61 (h) | <2.2e-16 *** | 12.482 | 0.00187 **    | ±4.74 (h) |  |
| RAL-208    | 4 |        |    |         |                |              |        |               |           |  |
| Null Time  | 1 | 173.86 | 23 | 207.15  | 54.41±2.01 (h) | <2.2e-16 *** | 104.33 | 8.195e-10 *** | ±2.60 (h) |  |
| Berlin-K   | 6 |        |    |         |                |              |        |               |           |  |
| Null Time  | 1 | 175.46 | 38 | 285.67  | 4.41±0.12 (d)  | <2.2e-16 *** | 56.293 | 6.125e-09 *** | ±0.21 (d) |  |
| Canton-S   | 6 |        |    |         |                |              |        |               |           |  |
| Null Time  | 1 | 139.59 | 45 | 360.93  | 3.92±0.12 (d)  | <2.2e-16 *** | 30.037 | 1.944e-06 *** | ±0.26 (d) |  |
| Hikone-A-S | 6 |        |    |         |                |              |        |               |           |  |
| Null Time  | 1 | 64.546 | 42 | 409.90  | 4.46±0.18 (d)  | 9.43e-16 *** | 8.0909 | 0.006911 **   | ±0.52 (d) |  |
| Oregon-R-C | 6 |        |    |         |                |              |        |               |           |  |
| Null Time  | 1 | 127.48 | 47 | 239.22  | 2.89±0.11 (d)  | <2.2e-16 *** | 57.197 | 1.313e-09 *** | ±0.17 (d) |  |
| RAL-208    | 6 |        |    |         |                |              |        |               |           |  |
| Null Time  | 1 | 216.65 | 45 | 348.85  | 4.26±0.12 (d)  | <2.2e-16 *** | 62.006 | 6.116e-10 *** | ±0.22 (d) |  |

<sup>1</sup> Test using the binomial variance function

<sup>2</sup> Test using the quasibinomial variance function

Table S2. Analysis of deviance showing the effects of time, genotype, and the time-by-genotype interaction on mortality at each temperature tested using both binomial and quasibinomial variance functions.

|                 | Temperature<br>(°C) | Df. | Deviance | Residual<br>Df. | Residual<br>Deviance | Binomial      | Quasibinomial |               |
|-----------------|---------------------|-----|----------|-----------------|----------------------|---------------|---------------|---------------|
|                 |                     |     |          |                 |                      | $P(> \chi )$  | $F$           | $Pr(>F)$      |
| Null            | -4                  |     |          | 173             | 1693.18              |               |               |               |
| Time            |                     | 1   | 927.68   | 172             | 765.50               | <2.2e-16 ***  | 341.8791      | <2.2e-16 ***  |
| Genotype        |                     | 4   | 268.17   | 168             | 497.33               | <2.2e-16 ***  | 24.7072       | 5.092e-16 *** |
| Time x Genotype |                     | 4   | 80.07    | 164             | 417.26               | <2.2e-16 ***  | 7.3775        | 1.730e-05 *** |
| Null            | -2                  |     |          | 188             | 1752.30              |               |               |               |
| Time            |                     | 1   | 748.23   | 187             | 1004.07              | <2.2e-16 ***  | 238.105       | <2.2e-16 ***  |
| Genotype        |                     | 4   | 499.52   | 183             | 504.55               | <2.2e-16 ***  | 39.740        | <2.2e-16 ***  |
| Time x Genotype |                     | 4   | 137.23   | 179             | 367.32               | <2.2e-16 ***  | 10.917        | 6.071e-08 *** |
| Null            | 0                   |     |          | 160             | 1235.72              |               |               |               |
| Time            |                     | 1   | 417.38   | 159             | 818.34               | <2.2e-16 ***  | 114.2882      | <2.2e-16 ***  |
| Genotype        |                     | 4   | 339.83   | 155             | 478.51               | <2.2e-16 ***  | 23.2636       | 5.389e-15 *** |
| Time x Genotype |                     | 4   | 79.86    | 151             | 398.64               | <2.2e-16 ***  | 5.4672        | 0.0003876 *** |
| Null            | 2                   |     |          | 167             | 1092.30              |               |               |               |
| Time            |                     | 1   | 297.42   | 166             | 794.88               | <2.2e-16 ***  | 159.134       | <2.2e-16 ***  |
| Genotype        |                     | 4   | 467.90   | 162             | 326.98               | <2.2e-16 ***  | 62.588        | <2.2e-16 ***  |
| Time x Genotype |                     | 4   | 24.98    | 158             | 302.01               | 5.084e-05 *** | 3.341         | 0.01173 *     |
| Null            | 4                   |     |          | 119             | 986.81               |               |               |               |
| Time            |                     | 1   | 582.10   | 118             | 404.71               | <2.2e-16 ***  | 156.5885      | <2.2e-16 ***  |
| Genotype        |                     | 4   | 180.45   | 114             | 224.26               | <2.2e-16 ***  | 12.1359       | 3.31e-08 ***  |
| Time x Genotype |                     | 4   | 12.34    | 110             | 211.92               | 0.01501 *     | 0.8297        | 0.509         |
| Null            | 6                   |     |          | 221             | 1673.78              |               |               |               |
| Time            |                     | 1   | 632.73   | 220             | 1041.05              | <2.2e-16 ***  | 148.5252      | <2.2e-16 ***  |
| Genotype        |                     | 4   | 118.35   | 216             | 922.69               | <2.2e-16 ***  | 6.9455        | 2.846e-05 *** |
| Time x Genotype |                     | 4   | 1.86     | 212             | 920.83               | 0.7612        | 0.1092        | 0.9792        |

Table S3. Analysis of deviance showing the effects of time, temperature, genotype, and their interactions on mortality tested using the quasibinomial variance function. Results using the binomial variance function are presented in Table 1.

|                               | Df. | Deviance | Residual<br>Df. | Residual<br>Deviance | <i>F</i> | <i>Pr(&gt;F)</i> |
|-------------------------------|-----|----------|-----------------|----------------------|----------|------------------|
| Null                          |     |          | 1035            | 8975.8               |          |                  |
| Time                          | 1   | 1040.65  | 1034            | 7935.2               | 320.7772 | <2.2e-16 ***     |
| Temperature                   | 5   | 2060.02  | 1029            | 5875.2               | 126.9991 | <2.2e-16 ***     |
| Genotype                      | 4   | 459.95   | 1025            | 5415.2               | 35.4449  | <2.2e-16 ***     |
| Time x Temperature            | 5   | 1271.95  | 1020            | 4143.3               | 78.4150  | <2.2e-16 ***     |
| Time x Genotype               | 4   | 312.71   | 1016            | 3830.6               | 24.0983  | <2.2e-16 ***     |
| Temperature x Genotype        | 20  | 919.13   | 996             | 2911.4               | 14.1660  | <2.2e-16 ***     |
| Time x Temperature x Genotype | 20  | 293.45   | 976             | 2618.0               | 4.5228   | 2.192e-10 ***    |

Table S4. Logistic regression models used to fit curves for mortality at -4°C with altered humidity. Shown are the analysis of deviance results and LT<sub>50</sub> estimates with standard error calculated using binomial and quasibinomial variance functions.

| Genotype   | Treatment | Factors | Df. | Deviance | Residual Df. | Residual Deviance | LT <sub>50</sub> ±SE (min) (binomial) | $P(> \chi )^1$ | F      | $Pr(>F)^2$    | SE (quasibinomial) |
|------------|-----------|---------|-----|----------|--------------|-------------------|---------------------------------------|----------------|--------|---------------|--------------------|
| Berlin-K   | Dry       | Null    |     |          | 29           | 229.60            | 50.94±2.61                            |                |        |               |                    |
|            |           | Time    | 1   | 178.03   | 28           | 51.57             |                                       | < 2.2e-16 ***  | 107.21 | 4.44e-11 ***  | ±3.37              |
|            | Control   | Null    |     |          | 29           | 197.219           | 47.89±3.06                            |                |        |               |                    |
|            |           | Time    | 1   | 145.00   | 28           | 52.222            |                                       | < 2.2e-16 ***  | 80.29  | 1.025e-09 *** | ±4.11              |
|            | Humid     | Null    |     |          | 29           | 198.823           | 52.90±2.93                            |                |        |               |                    |
|            |           | Time    | 1   | 161.9    | 28           | 36.923            |                                       | < 2.2e-16 ***  | 134.09 | 3.439e-12 *** | ±3.22              |
| Canton-S   | Dry       | Null    |     |          | 29           | 249.914           | 114.15±3.27                           |                |        |               |                    |
|            |           | Time    | 1   | 158.62   | 28           | 91.297            |                                       | < 2.2e-16 ***  | 46.669 | 2.016e-07 *** | ±6.02              |
|            | Control   | Null    |     |          | 29           | 261.87            | 108.76±3.19                           |                |        |               |                    |
|            |           | Time    | 1   | 169.38   | 28           | 92.49             |                                       | < 2.2e-16 ***  | 44.565 | 3.032e-07 *** | ±6.22              |
|            | Humid     | Null    |     |          | 29           | 261.39            | 122.00±3.24                           |                |        |               |                    |
|            |           | Time    | 1   | 152.16   | 28           | 109.22            |                                       | < 2.2e-16 ***  | 41.358 | 5.785e-07 *** | ±6.21              |
| Hikone-A-S | Dry       | Null    |     |          | 29           | 220.21            | 123.98±4.14                           |                |        |               |                    |
|            |           | Time    | 1   | 109.13   | 28           | 111.08            |                                       | < 2.2e-16 ***  | 17.209 | 0.0002819 *** | ±10.41             |
|            | Control   | Null    |     |          | 29           | 315.66            | 111.40±2.84                           |                |        |               |                    |
|            |           | Time    | 1   | 197.75   | 28           | 117.90            |                                       | < 2.2e-16 ***  | 13.262 | 0.001088 **   | ±10.96             |
|            | Humid     | Null    |     |          | 29           | 237.195           | 121.99±2.99                           |                |        |               |                    |
|            |           | Time    | 1   | 167.89   | 28           | 69.302            |                                       | < 2.2e-16 ***  | 24.403 | 3.269e-05 *** | ±7.85              |
| Oregon-R-C | Dry       | Null    |     |          | 23           | 198.397           | 177.35±4.50                           |                |        |               |                    |
|            |           | Time    | 1   | 176.59   | 22           | 21.808            |                                       | < 2.2e-16 ***  | 213.67 | 8.253e-13 *** | ±4.09              |
|            | Control   | Null    |     |          | 23           | 275.116           | 147.02±3.70                           |                |        |               |                    |
|            |           | Time    | 1   | 239.93   | 22           | 35.187            |                                       | < 2.2e-16 ***  | 148.83 | 2.895e-11 *** | ±4.70              |
|            | Humid     | Null    |     |          | 23           | 253.085           | 153.07±4.37                           |                |        |               |                    |
|            |           | Time    | 1   | 203.86   | 22           | 49.223            |                                       | < 2.2e-16 ***  | 96.867 | 1.611e-09 *** | ±6.33              |
| RAL-208    | Dry       | Null    |     |          | 29           | 234.54            | 115.27±3.75                           |                |        |               |                    |
|            |           | Time    | 1   | 127.90   | 28           | 106.64            |                                       | < 2.2e-16 ***  | 38.12  | 1.147e-06 *** | ±6.88              |
|            | Control   | Null    |     |          | 29           | 248.47            | 111.32±3.69                           |                |        |               |                    |
|            |           | Time    | 1   | 132.42   | 28           | 116.05            |                                       | < 2.2e-16 ***  | 35.594 | 2.005e-06 *** | ±7.13              |
|            | Humid     | Null    |     |          | 29           | 242.50            | 125.34±4.74                           |                |        |               |                    |
|            |           | Time    | 1   | 90.538   | 28           | 151.96            |                                       | < 2.2e-16 ***  | 20.514 | 0.0001003 *** | ±9.96              |

<sup>1</sup> Test using the binomial variance function

<sup>2</sup> Test using the quasibinomial variance function

Figure S1. Cold survival data for A)  $-4^{\circ}\text{C}$ , B)  $-2^{\circ}\text{C}$ , C)  $0^{\circ}\text{C}$ , D)  $2^{\circ}\text{C}$ , E)  $4^{\circ}\text{C}$ , and F)  $6^{\circ}\text{C}$ . At least five independent pools of 10 males were sampled at five time points for each temperature. Plotted is the proportion dead for each independent pool of males and the fitted line using logistic regression that was used to infer  $LT_{50}$ . Some data points are overlapping.

Figure S1A

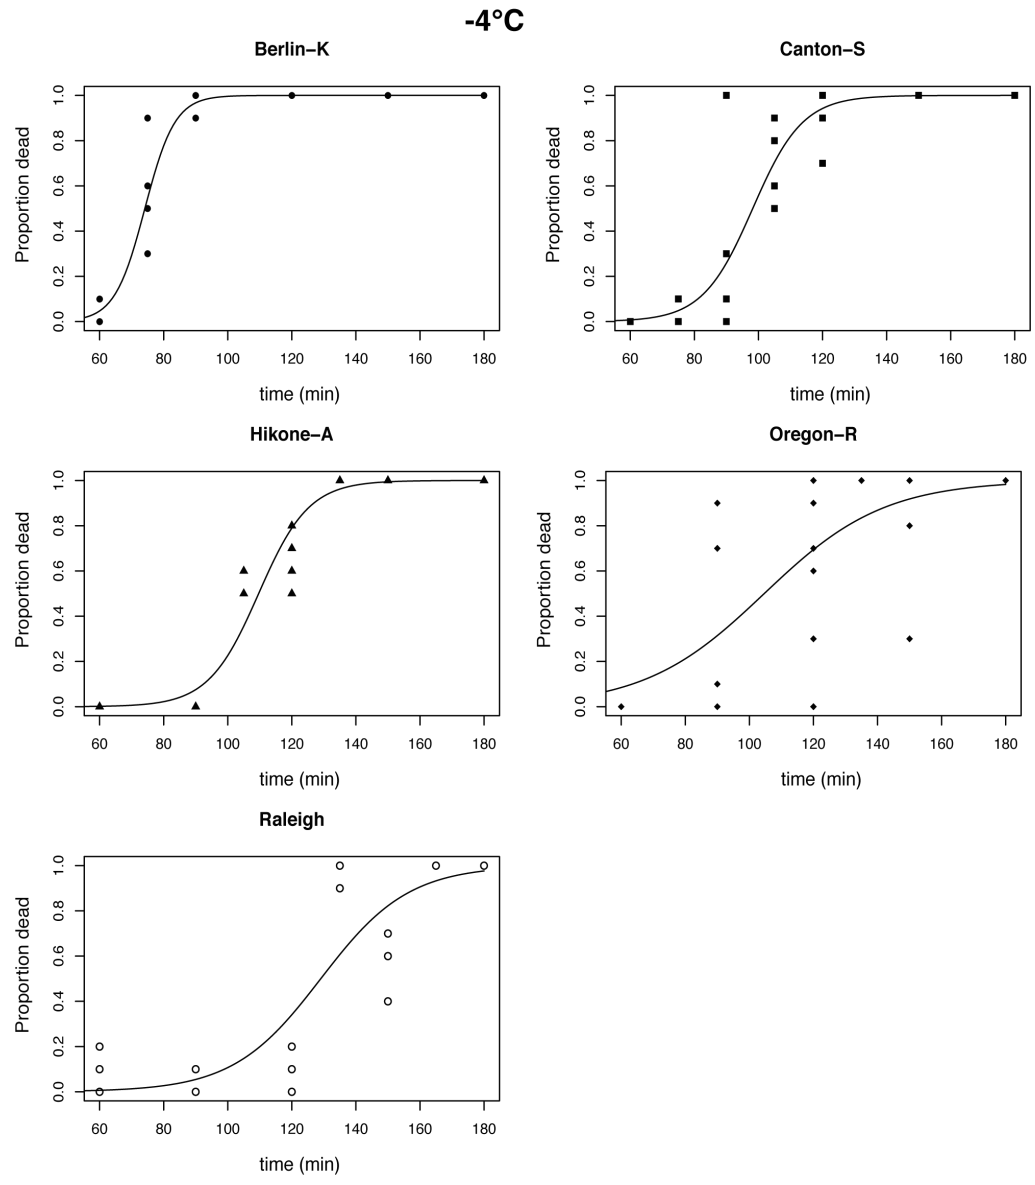

Figure S1B

-2°C

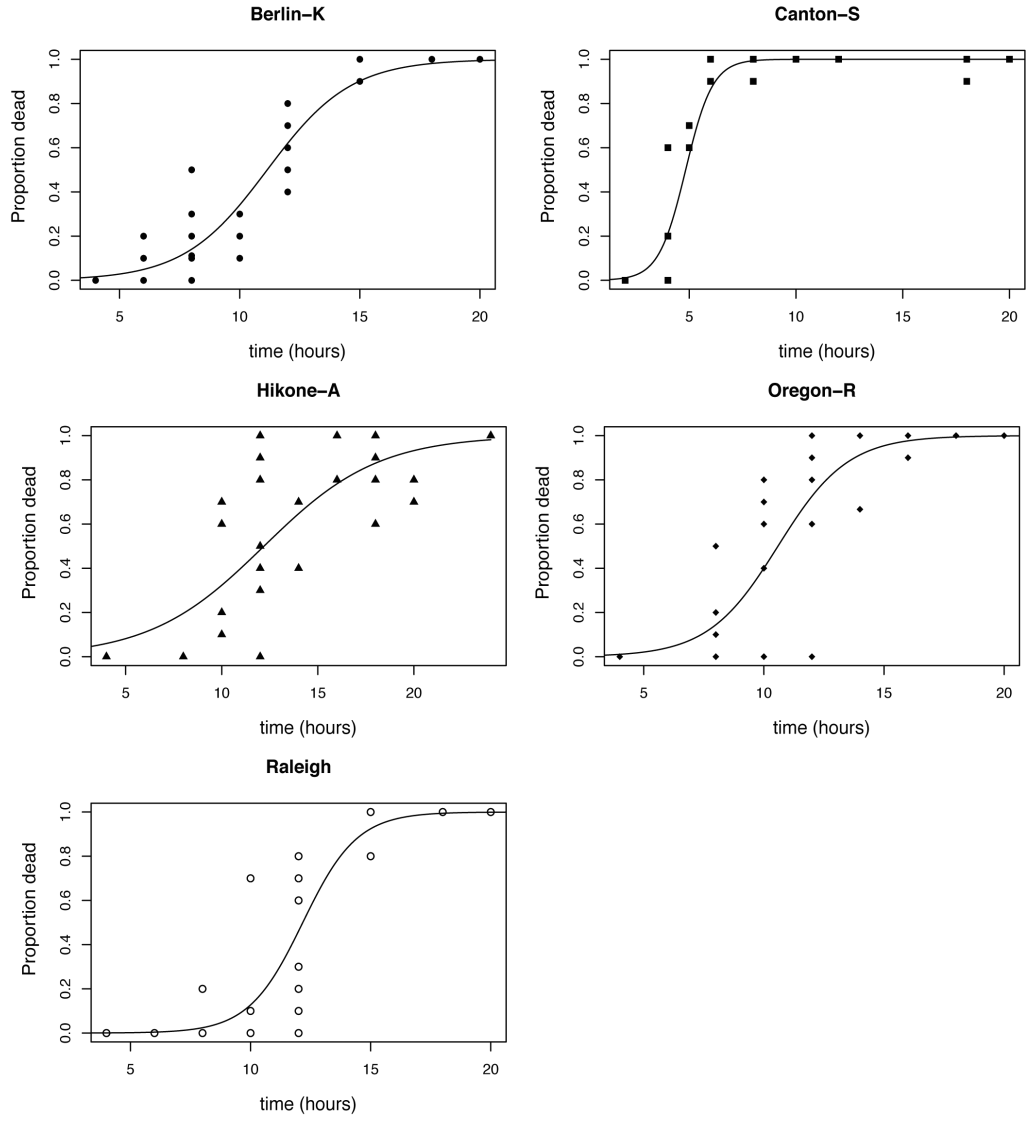



Figure S1C

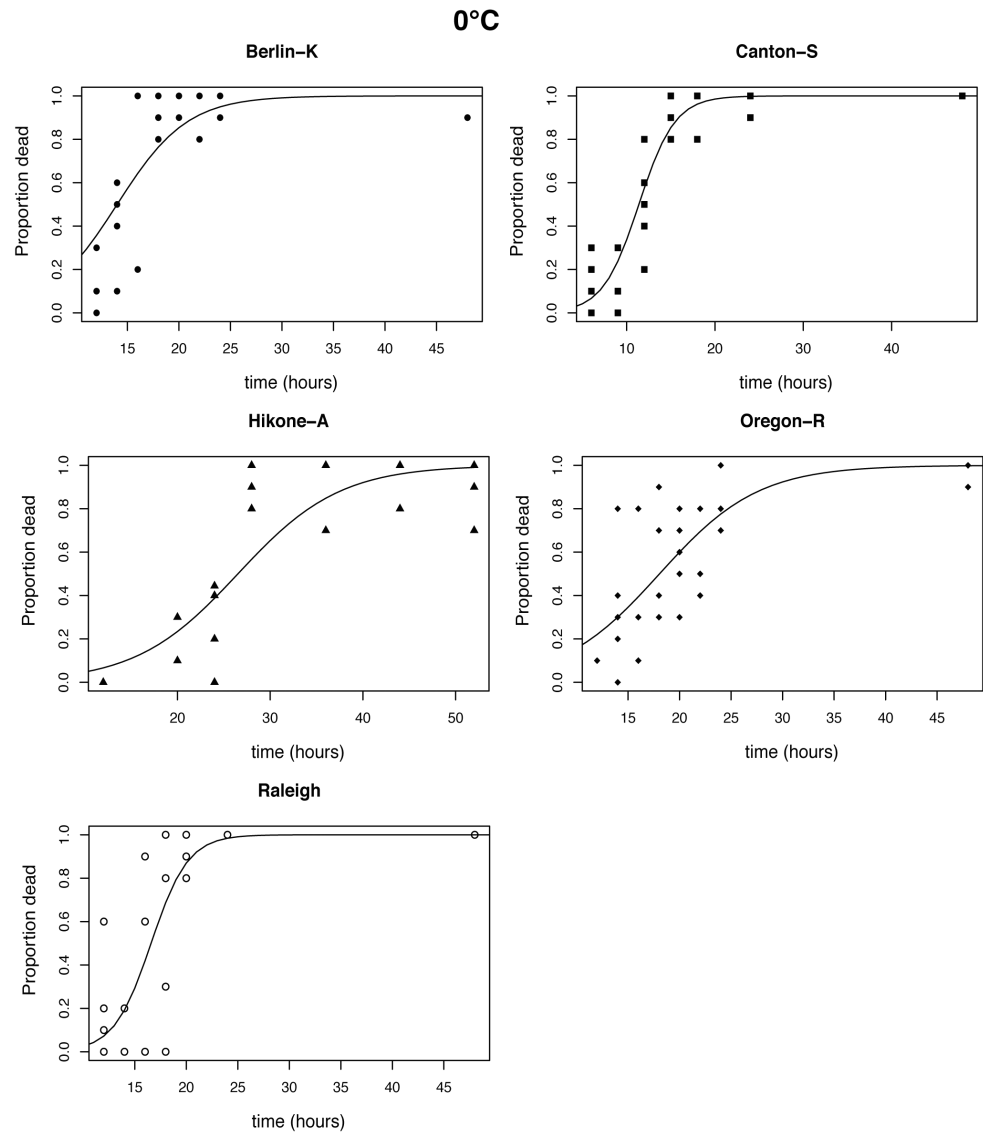

Figure S1D

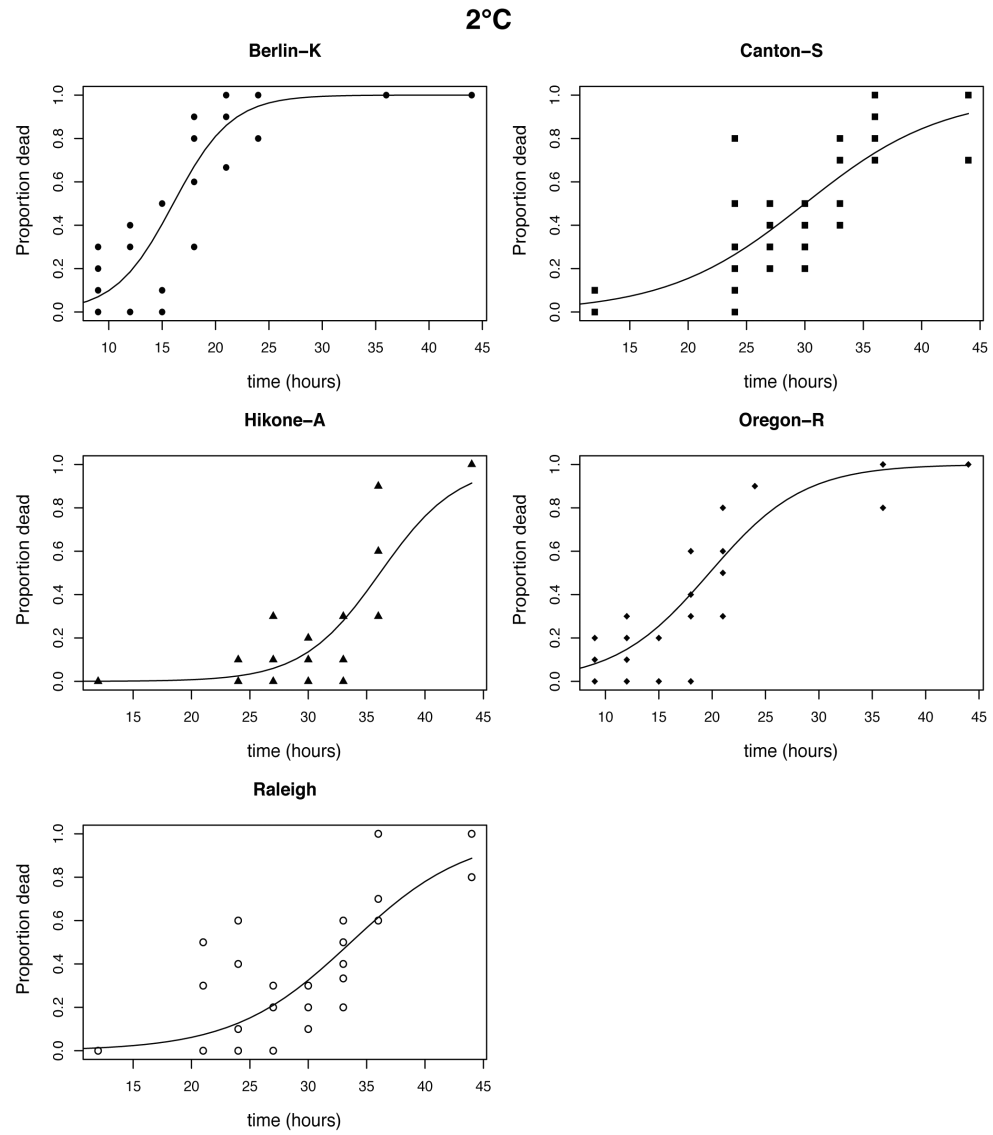

Figure S1E

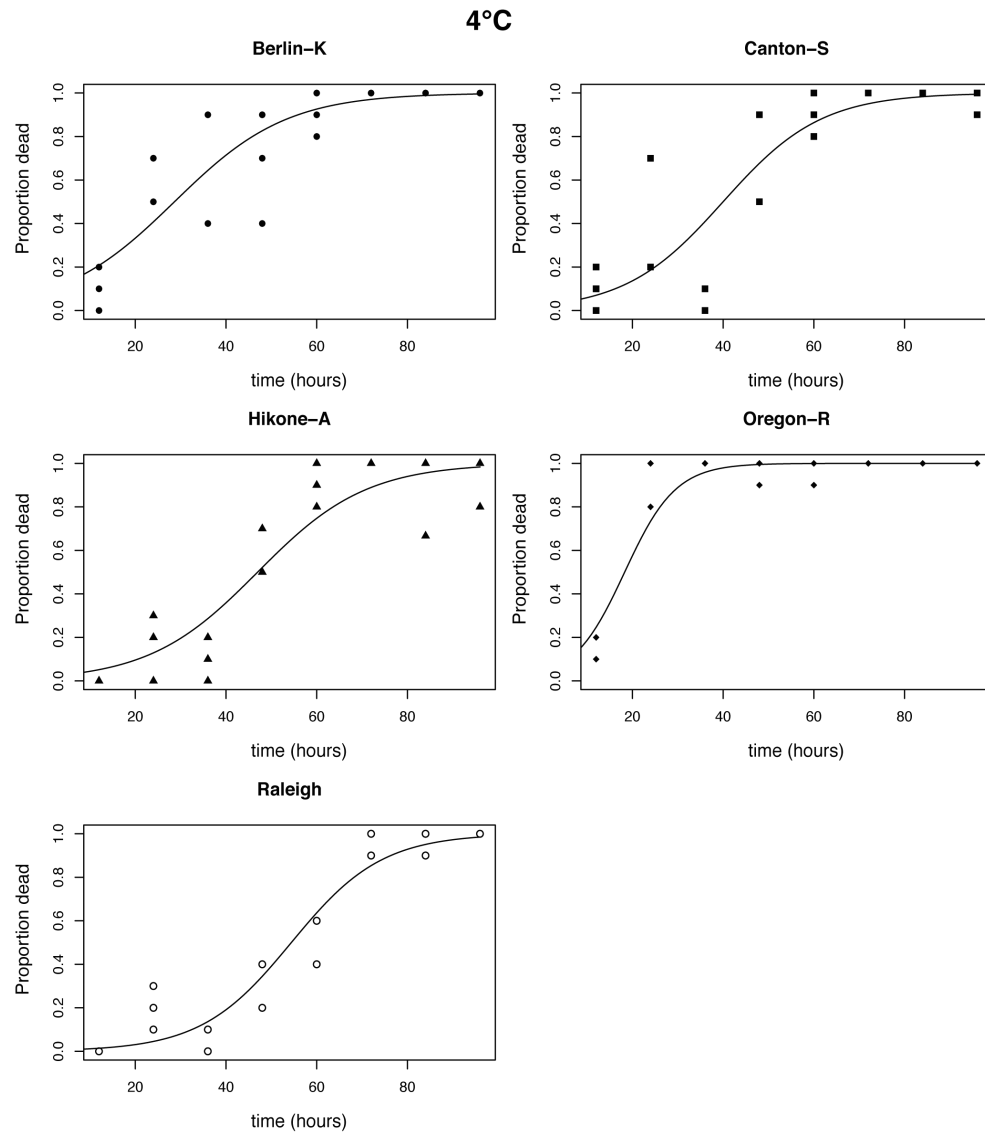

Figure S1F

6°C

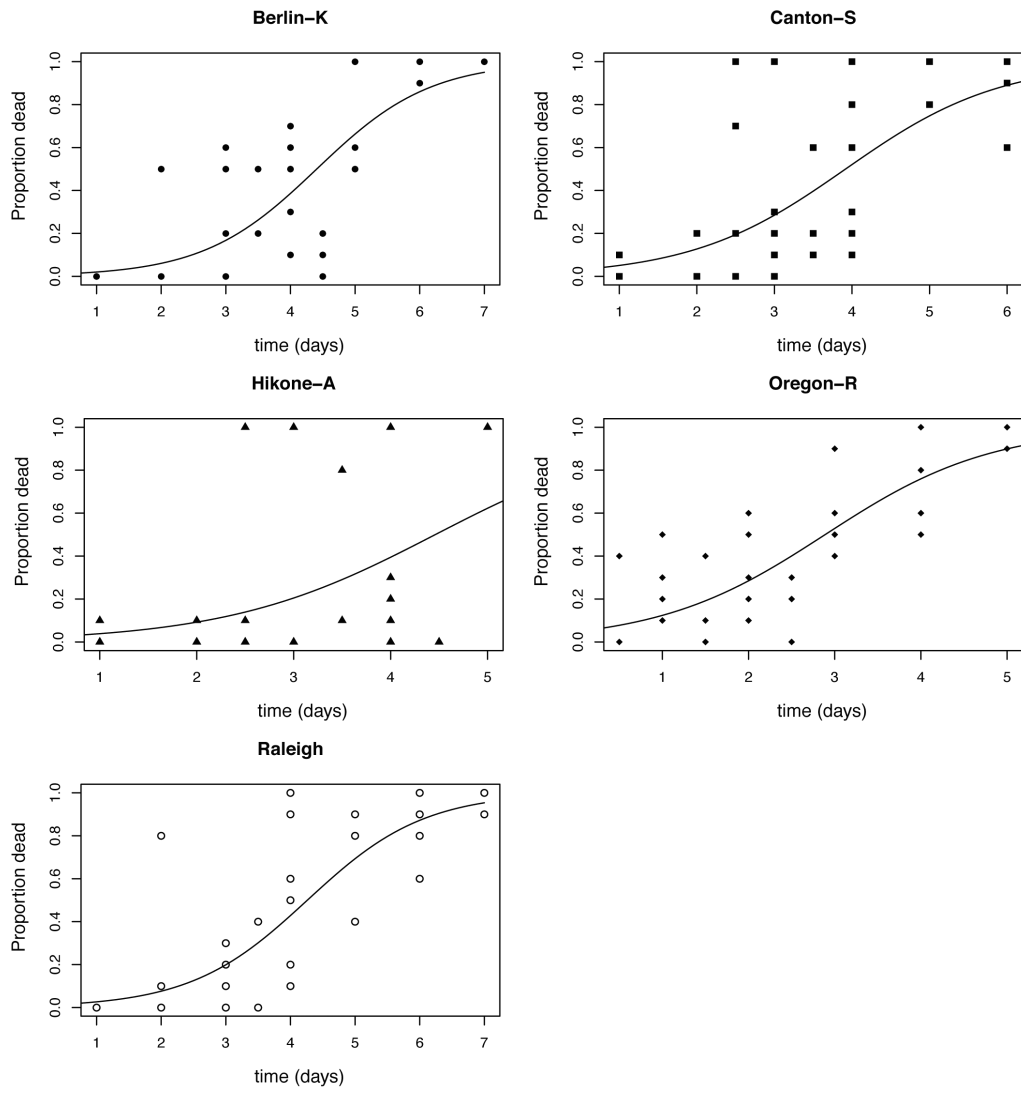

Figure S2. There is very little change in mass during freezing at  $-80^{\circ}\text{C}$  followed by our weighing protocol. Flies were briefly anesthetized and weighed while alive (Live). After freezing for 24 hours at  $-80^{\circ}\text{C}$ , flies were weighed again using the protocol described in the methods (Dead). There were consistent, but very small (1.5-3% of wet mass) decreases in mass for the majority of individual flies that were similar across genotypes, resulting in a significant effect of freezing when using a paired t-test ( $P_{t\text{-test}} < 0.001$ ). The figure plots the mean masses with standard errors for each genotype.

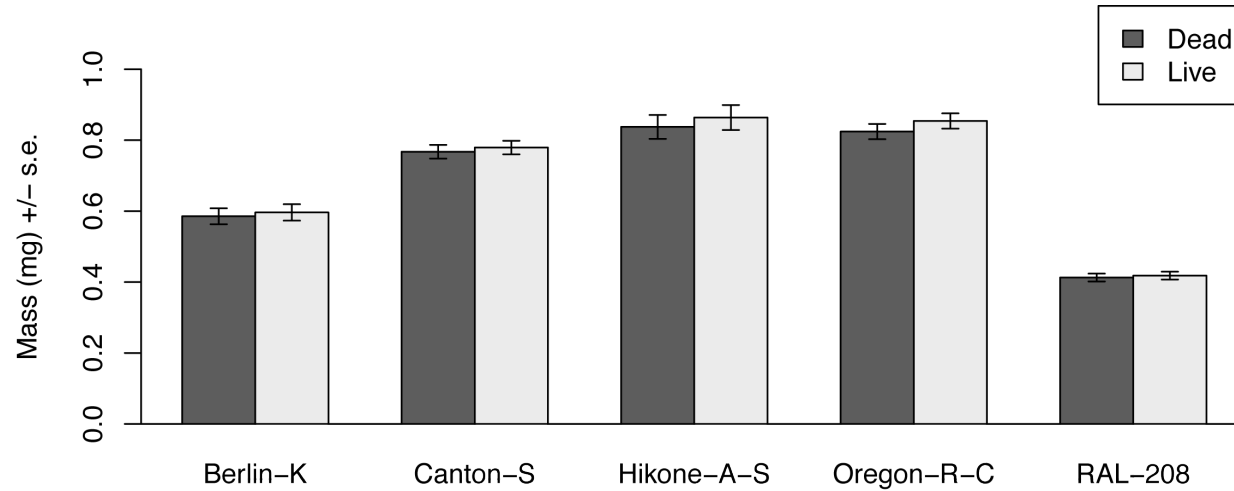

Supplement: supp_216.7.1174_JEB076539.pdf [file supp_216.7.1174_JEB076539.pdf]
